# Supplementary material for: Type 2 immunity-dependent reduction of segmented filamentous bacteria in mice infected with the helminthic parasite Nippostrongylus brasiliensis
Source: PubMed Central journal article supplement (PMC4574229; doi:10.1186/s40168-015-0103-8), 2015-09-17

Fig. S2

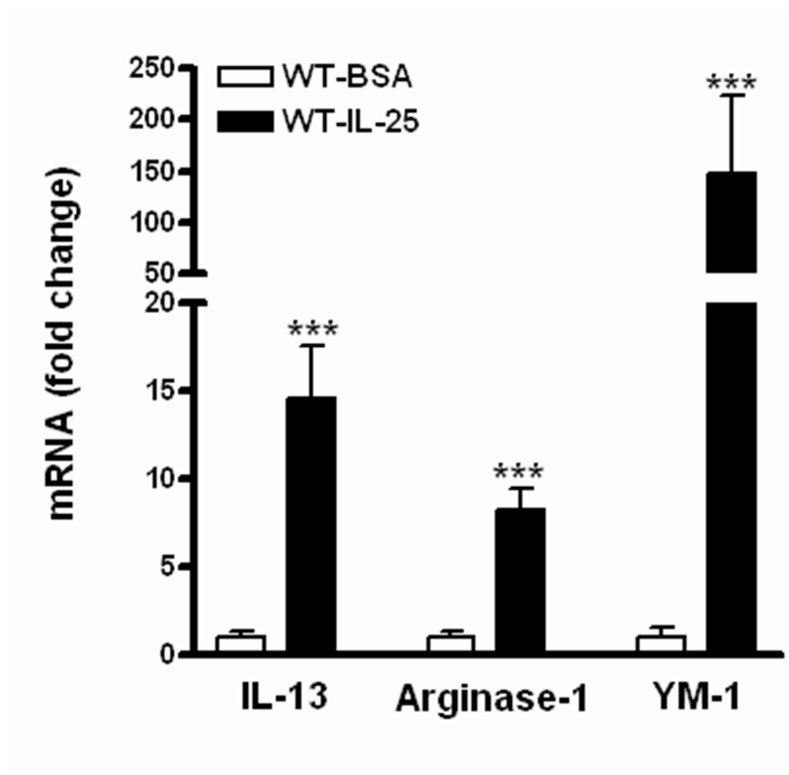

Supplement: 40168_2015_103_MOESM2_ESM.pdf [file 40168_2015_103_MOESM2_ESM.pdf]
